# Supplementary material for: The robust, high-throughput, and temporally regulated roxCre and loxCre reporting systems for genetic modifications in vivo
Source: eLife. 2026 Apr 20;13:RP97717. doi: 10.7554/eLife.97717 (PMC13095210; doi:10.7554/eLife.97717)
Supplement: Figure 1—source data 1. [file elife-97717-fig1-data1.xlsx]

## Sheet: Sheet1
	mCre1	mCre2	mCre3	mCre4	mCre5	mCre6	mCre7	mCre8	mCre9	mCre10	mCre11	mCre12	no Cre	Cre
1	25.5396	20.3704	22.9084	28.3697	0	22.6648	28.4302	0.14881	0.128041	28.8973	23.5772	0	0.123001	25.5426
2	28.595	23.126	20.6186	25.5639	0	20.9195	25.7732	0	0	25.1177	20.5514	0.125471	0	21.2894
3	20.0726	22.8099	20.9184	23.8702	0.171821	28.6726	24.8654	0	0	20.9864	27.1565	0	0	28.3228
4	24.8951	28.6004	27.6347	24.0343	0	21.9198	25.3219	0.256082	0.410397	24.4326	21.7848	0.25	0	23.7288
5	26.2346	24.8731	24.0987	27.6821	0.145773	25.3201	26.9932	0	0	28.22	25.641	0	0	25.9649
