# Supplementary material for: The robust, high-throughput, and temporally regulated roxCre and loxCre reporting systems for genetic modifications in vivo
Source: eLife. 2026 Apr 20;13:RP97717. doi: 10.7554/eLife.97717 (PMC13095210; doi:10.7554/eLife.97717)
Supplement: Figure 2—figure supplement 3—source data 1. [file elife-97717-fig2-figsupp3-data1.xlsx]

## Sheet: Figure 2—figure supplement3-E
	Rosa26-DreER;Alb-roxCre1-tdT;Rosa26-GFP		Rosa26-DreER;Alb-roxCre7-GFP;Rosa26-tdT
	no Tam	Tam	no Tam	Tam
1	0	100	0	100
2	0	100	0	100
3	0	100	0	100
