# Supplementary material for: The robust, high-throughput, and temporally regulated roxCre and loxCre reporting systems for genetic modifications in vivo
Source: eLife. 2026 Apr 20;13:RP97717. doi: 10.7554/eLife.97717 (PMC13095210; doi:10.7554/eLife.97717)
Supplement: Figure 2—figure supplement 5—source data 1. [file elife-97717-fig2-figsupp5-data1.xlsx]

## Sheet: Figure 2—figure supplement5-B
	Sample	Rosa26-DreER;Cdh5-roxCre4-tdT;Rosa26-Confetti	Rosa26-DreER;Cdh5-roxCre10-GFP;Rosa26-Confetti	Unpaired t test: p value
Brain	1	69.4444	75	0.0154
	2	48	84.2105
	3	64.5161	76.4706
	4	73.3333	74.6269
	5	62.8571	79.6296
Heart	1	19.2308	72.8571	0.0001
	2	38.9831	91.3043
	3	33.8462	90
	4	57.5758	86.1111
	5	38.3562	96.5517
Lung	1	26.6667	93.8272	<0.0001
	2	17.0213	93.8272
	3	29.1667	99.0385
	4	27.2727	83.6735
	5	37.0968	97.8723
Stomach	1	53.8462	90.9091	<0.0001
	2	57.5758	92.233
	3	50	87.5
	4	55	91.453
	5	33.9286	94.1176
Pancreas	1	14.2857	72.973	<0.0001
	2	28	78.7234
	3	5.88235	84.7458
	4	19.2308	80
	5	30.4348	85.4545
Colon	1	20.8333	71.4286	<0.0001
	2	27.2727	85
	3	21.7391	57.1429
	4	22.2222	70
	5	25.8065	81.25
