# Supplementary material for: The robust, high-throughput, and temporally regulated roxCre and loxCre reporting systems for genetic modifications in vivo
Source: eLife. 2026 Apr 20;13:RP97717. doi: 10.7554/eLife.97717 (PMC13095210; doi:10.7554/eLife.97717)
Supplement: Figure 2—source data 1. [file elife-97717-fig2-data1.xlsx]

## Sheet: Figure 2C
	Rosa26-DreER;Alb-roxCre1-tdT;Rosa26-Confetti	Rosa26-DreER;Alb-roxCre7-GFP;Rosa26-Confetti	Alb-CreER;Rosa26-Confetti
1	100	86.755	0.5
2	100	92.7374	0.539374
3	100	88.4615	0.40404
4	99.8208	89.881	0.659134
5	99.918	75.5102	0.418994
6	99.9091	68.0203	0.165837
7	100	72.6457	0.239808
8	100	67.5105	0.42328
9	99.8294	67.2489	0.373483
10	100	63.4783	0.394011
11	99.8264	72.8814	0.194932
	One-way ANOVA analysis		Adjusted p value
	Rosa26-DreER;Alb-roxCre1-tdT;Rosa26-Confetti vs Rosa26-DreER;Alb-roxCre7-GFP;Rosa26-Confetti		<0.0001
	Rosa26-DreER;Alb-roxCre1-tdT;Rosa26-Confetti vs Alb-CreER;Rosa26-Confetti		<0.0001
	Rosa26-DreER;Alb-roxCre7-GFP;Rosa26-Confetti vs Alb-CreER;Rosa26-Confetti		<0.0001

## Sheet: Figure 2F
	Rosa26-DreER;Cdh5-roxCre4-tdT;Rosa26-Confetti	Rosa26-DreER;Cdh5-roxCre10-GFP;Rosa26-Confetti	Cdh5-CreER;Rosa26-Confetti
1	46.1538	80	4.7619
2	30.4348	85.7143	7.61905
3	41.1765	81.8182	5.12821
4	40	86.3636	5.71429
5	30	53.9568	8.77193
6	41.6667	70	8.33333
7	52.9412	78.4314	11.875
8	26.087	78.8235	14.2857
9	42.8571	55.3846	13.6364
10	51.2821	84	6
11	35.2941	61.1111	15.7407
	One-way ANOVA analysis		Adjusted p value
	Rosa26-DreER;Cdh5-roxCre4-tdT;Rosa26-Confetti vs Rosa26-DreER;Cdh5-roxCre10-GFP;Rosa26-Confetti		<0.0001
	Rosa26-DreER;Cdh5-roxCre4-tdT;Rosa26-Confetti vs Cdh5-CreER;Rosa26-Confetti		<0.0001
	Rosa26-DreER;Cd5-roxCre10-GFP;Rosa26-Confetti vs Cdh5-CreER;Rosa26-Confetti		<0.0001
