# Supplementary material for: The robust, high-throughput, and temporally regulated roxCre and loxCre reporting systems for genetic modifications in vivo
Source: eLife. 2026 Apr 20;13:RP97717. doi: 10.7554/eLife.97717 (PMC13095210; doi:10.7554/eLife.97717)
Supplement: Figure 3—source data 1. [file elife-97717-fig3-data1.xlsx]

## Sheet: Figure 3C
sample	Cyp2e1-DreER;Alb-roxCre-tdT;Ctnnb1flox/+	Cyp2e1-DreER;Alb-roxCre-tdT;Ctnnb1flox/flox
1	0.965105	0.0318949
2	0.771857	0.0191369
3	1.26304	0.0382739
4	1.31653	0.0529774
5	0.683466	0.089875
Unpaired t test: p value	<0.0001

## Sheet: Figure 3D
sample	Cyp2e1-DreER;Alb-roxCre-tdT;Ctnnb1flox/+	Cyp2e1-DreER;Alb-roxCre-tdT;Ctnnb1flox/flox
1	0.999295	0.0584771
2	1.07487	0.0631347
3	0.925838	0.0698443
4	0.794194	0.00779132
5	1.20581	0.0205782
Unpaired t test: p value	<0.0001

## Sheet: Figure 3J
sample	Cyp2e1-DreER;Alb-roxCre-tdT;Ctnnb1flox/+	Cyp2e1-DreER;Alb-roxCre-tdT;Ctnnb1flox/flox
1	0.750313	0.0248796
2	0.937994	0.0136237
3	1.31169	0.0114132
Unpaired t test: p value	0.004

## Sheet: Figure 3K
sample	Cyp2e1-DreER;Alb-roxCre-tdT;Ctnnb1flox/+	Cyp2e1-DreER;Alb-roxCre-tdT;Ctnnb1flox/flox
1	1.17954	0.0168212
2	1.07651	0.0151178
3	1.06615	0.023555
4	1.07905	0.0260383
5	0.942612	0.023782
6	0.656136	0.019657
Unpaired t test: p value	<0.0001

## Sheet: Figure 3L
Figure3L	Cyp2e1-DreER;Alb-roxCre-tdT;Ctnnb1 flox/+						Cyp2e1-DreER;Alb-roxCre-tdT;Ctnnb1 flox/flox
sample	1	2	3	4	5	6	1	2	3	4	5	6	Unpaired t test: p value
Glul	1.32456	1.04448	1.00681	1.15344	0.938177	0.532529	0.10855	0.107909	0.122628	0.148957	0.0961573	0.208047	<0.0001
Axin2	1.06447	1.2244	1.14804	1.08065	0.899161	0.58328	0.0610429	0.0645911	0.0893782	0.0888356	0.0524374	0.0620188	<0.0001
Cyp1a2	1.0179	0.917882	1.03996	1.1429	1.01011	0.87125	0.0448074	0.0446916	0.042274	0.042572	0.0406756	0.04847	<0.0001
Cyp2e1	1.10458	1.1814	1.00692	1.08874	1.00446	0.6139	0.00596274	0.00366059	0.00535398	0.00654436	0.00346072	0.00693326	<0.0001
Oat	1.02871	1.06466	0.618832	0.875833	1.28191	1.13006	0.0113714	0.0181287	0.0184534	0.0227888	0.0124274	0.026013	<0.0001
Tcf7	0.901837	1.04386	1.1421	1.32999	0.936865	0.645351	0.425723	0.371524	0.403068	0.46339	0.368622	0.496783	0.0001
Lect2	1.11666	1.1899	1.13248	0.920436	0.834282	0.806244	0.00450141	0.00541579	0.00658377	0.004013	0.00325952	0.00321388	<0.0001
Tbx3	0.99044	1.18406	1.23794	1.15593	0.92575	0.505881	0.067038	0.0606926	0.0784203	0.0675971	0.0514698	0.108951	<0.0001
Slc1a2	1.01161	1.17563	1.23817	1.13435	0.812536	0.627694	0.00093319	0.0002395	0.00376092	0.00449197	0.00425449	0.00178128	<0.0001
Rhbg	0.678206	1.26207	1.35364	1.18781	0.789694	0.728587	0.390633	0.337357	0.346105	0.3749	0.264726	0.506074	0.0006
