# Supplementary material for: The robust, high-throughput, and temporally regulated roxCre and loxCre reporting systems for genetic modifications in vivo
Source: eLife. 2026 Apr 20;13:RP97717. doi: 10.7554/eLife.97717 (PMC13095210; doi:10.7554/eLife.97717)
Supplement: Figure 4—figure supplement 1—source data 1. [file elife-97717-fig4-figsupp1-data1.xlsx]

## Sheet: Figure 4 figure supplement 1B
sample	Cdh5-CreER;Rosa26-tdT	Cdh5-CreER;Rosa26-loxCre-tdT
1	1.55	0.02
2	2.23	0.056
3	2.27	0.028
4	0.64	0.038
5	0.51	0.013
Unpaired t test p value		0.0057
