# Supplementary material for: The robust, high-throughput, and temporally regulated roxCre and loxCre reporting systems for genetic modifications in vivo
Source: eLife. 2026 Apr 20;13:RP97717. doi: 10.7554/eLife.97717 (PMC13095210; doi:10.7554/eLife.97717)
Supplement: Figure 4—source data 1. [file elife-97717-fig4-data1.xlsx]

## Sheet: Figure 4G
	sample	Cdh5-CreER;Rosa26-tdT	Cdh5-CreER;Rosa26-loxCre-tdT	Unpaired t test: p value
Heart	1	96.763	98.7701	0.4641
	2	95.4098	96.6052
	3	95.1009	97.3951
	4	97.1591	97.2222
	5	97.8723	95.2838
Intestine	1	92.6518	98.4925	0.0696
	2	94.6629	93.1148
	3	93.4884	97.7654
	4	85.8025	95.8106
	5	94.6429	95.9596
Kidney	1	91.6179	96.0766	0.306
	2	89.49	83.2636
	3	89.3258	88.5827
	4	95.9596	86.6548
	5	97.1069	93.4726
Lung	1	93.5614	99.2063	<0.0001
	2	93.7828	98.6702
	3	89.1749	99.0228
	4	91.6923	99.4253
	5	91.9806	98.6348
Liver	1	98.9873	98.7755	0.1066
	2	89.5092	89.8462
	3	71.4423	94.2238
	4	68.5673	96.7828
	5	92.6488	98.2456
Spleen	1	99.7297	94.5876	0.7088
	2	98.5222	99.0826
	3	96.9697	99.6678
	4	96.7391	99.6528
	5	98.2275	99.3631
Stomach	1	95.1289	98.6333	<0.0001
	2	91.2833	99.3827
	3	93.6893	99.6032
	4	92.3729	99.7653
	5	95.0739	98.855
