# Supplementary material for: The robust, high-throughput, and temporally regulated roxCre and loxCre reporting systems for genetic modifications in vivo
Source: eLife. 2026 Apr 20;13:RP97717. doi: 10.7554/eLife.97717 (PMC13095210; doi:10.7554/eLife.97717)
Supplement: Figure 5—source data 1. [file elife-97717-fig5-data1.xlsx]

## Sheet: Figure 5D
	Sample	Cdh5-CreER;Rosa26-Confetti	Cdh5-CreER;Rosa26-loxCre-tdT;Rosa26-Confetti	Unpaired t test p value
Brain	1	3.15789	97.3262	<0.0001
	2	7.2	93.7799
	3	4.56432	98.0831
	4	2.92398	99.5816
	5	6.09137	99.3311
Thymus	1	6.85484	99.8941	<0.0001
	2	5.55556	100
	3	6.17021	99.8755
	4	4.91803	99.7114
	5	6.6313	99.6803
Heart	1	23.3333	100	<0.0001
	2	22.4044	100
	3	18.7879	99.4872
	4	18.1287	95.6284
	5	34.5133	93.9394
Lung	1	21.9355	100	<0.0001
	2	8.08824	99.0415
	3	26.6881	99.575
	4	15.3017	99.8563
	5	16.474	99.3976
Stomach	1	22.2222	99.8316	<0.0001
	2	14.2857	99.0421
	3	32.2785	99.7563
	4	26.4151	100
	5	11.3402	99.729
Intestine	1	14.9854	99.9126	<0.0001
	2	9.25926	100
	3	23.5878	99.8927
	4	17.9337	100
	5	17.1795	99.8623
