# Supplementary material for: The robust, high-throughput, and temporally regulated roxCre and loxCre reporting systems for genetic modifications in vivo
Source: eLife. 2026 Apr 20;13:RP97717. doi: 10.7554/eLife.97717 (PMC13095210; doi:10.7554/eLife.97717)
Supplement: Figure 6—source data 1. [file elife-97717-fig6-data1.xlsx]

## Sheet: Figure 6D
sample	Alb-CreER;Rosa26-tdT2;Rosa26-Confetti	Alb-CreER;iSuRe-Cre;Rosa26-Confetti	Alb-CreER;Rosa26-loxCre-tdT;Rosa26-Confetti
1	33.3333	1.40237	87.1287
2	30.5556	1.57005	87.1429
3	37.5	1.45379	93.4426
4	37.069	1.14943	98.1651
5	41.2281	1.87135	94.1667
6	31.7308	0.976801	90.5172
			one-way ANOVA: p value
	Alb-CreER;Rosa26-tdT2;Rosa26-Confetti vs Alb-CreER;iSuRe-Cre;Rosa26-Confetti		<0.0001
	Alb-CreER;iSuRe-Cre;Rosa26-Confetti vs Alb-CreER;Rosa26-loxCre-tdT;Rosa26-Confetti		<0.0001
	Alb-CreER;Rosa26-tdT2;R26-Confetti vs Alb-CreER;Rosa26-loxCre-tdT;Rosa26-Confetti		<0.0001

## Sheet: Figure 6E
sample	Alb-CreER;Rosa26-tdT2;Rosa26-Confetti	Alb-CreER;iSuRe-Cre;Rosa26-Confetti	Alb-CreER;Rosa26-loxCre-tdT;Rosa26-Confetti
1	0.600601	15.3846	100
2	2.0202	23.0769	100
3	1.0582	35.7143	100
4	0.516796	11.1111	100
5	0.945626	18.75	100
6	1.3468	12.5	100
			one-way ANOVA: p value
	Alb-CreER;Rosa26-tdT2;Rosa26-Confetti vs Alb-CreER;iSuRe-Cre;Rosa26-Confetti		<0.0001
	Alb-CreER;iSuRe-Cre;Rosa26-Confetti vs Alb-CreER;Rosa26-loxCre-tdT;Rosa26-Confetti		<0.0001
	Alb-CreER;Rosa26-tdT2;Rosa26-Confetti vs Alb-CreER;Rosa26-loxCre-tdT;Rosa26-Confetti		<0.0001
