# Supplementary material for: The robust, high-throughput, and temporally regulated roxCre and loxCre reporting systems for genetic modifications in vivo
Source: eLife. 2026 Apr 20;13:RP97717. doi: 10.7554/eLife.97717 (PMC13095210; doi:10.7554/eLife.97717)
Supplement: Figure 7—figure supplement 1—source data 1. [file elife-97717-fig7-figsupp1-data1.xlsx]

## Sheet: Figure7-figure supplement1-B
Sample	Alb-CreER;Rosa26-loxCre-tdT
1	0
2	0
3	0
4	0
5	0

## Sheet: Figure7-figure supplement1-C
Sample	Alb-CreER;Rosa26-tdT;Ctnnb1flox/+	Alb-CreER;Rosa26-tdT;Ctnnb1flox/flox
1	0.949286	0.809436
2	0.883124	1.13307
3	1.16759	0.909038
4	1.0661	0.92093
5	0.622641	1.03425
6	1.31126	1.2725
	Unpaired t test: p value	0.9145

## Sheet: Figure7-figure supplement1-E
5xTam					Tam					1/5xTam
Sample	tdT–	tdT+			Sample	tdT–	tdT+			Sample	tdT–	tdT+
1	1.07307	0.0227024			1	0.696233	0.0314884			1	0.867438	0.03381
2	1.10576	0.025124			2	0.802328	0.0524453			2	0.868218	0.0653349
3	0.955316	0.0184646			3	1.04151	0.0330038			3	0.839697	0.0274951
4	0.988357	0.0463129			4	1.24835	0.0280282			4	1.26462	0.037425
5	0.877504	0.0314806			5	1.21158	0.0233855			5	1.16003	0.0254978
Unpaired t test: p value		<0.0001			Unpaired t test: p value		<0.0001			Unpaired t test: p value		<0.0001
1/25xTam					1/125xTam
Sample	tdT–	tdT+			Sample	tdT–	tdT+
1	0.91855	0.0613665			1	0.78792	0.0702285
2	0.895325	0.0329565			2	1.2151	0.0357594
3	0.847578	0.0696459			3	1.20426	0.0830635
4	1.17289	0.0922677			4	0.717274	0.0642429
5	1.16565	0.0706611			5	1.07545	0.0600493
Unpaired t test: p value		<0.0001			Unpaired t test: p value		<0.0001

## Sheet: Figure7-figure supplement1-F
		Alb-CreER;Rosa26-loxCre-tdT;Ctnnb1flox/flox
Tam	sample	tdT+ Cells%	GS+ Heps%	E-CAD+ Heps%
5xTam	1	91.77	0	0
	2	96.44	0	0
	3	94.52	0	0
	4	93.9	0	0
	5	95.019	0	0
Tam	1	89.58	0	2.57143
	2	89.03	0.0493827	3.95062
	3	90.14	0	3.24051
	4	90.5	0.0454545	6.72727
	5	91.4627	0	5.47945
1/5Tam	1	57.23	1.91195	24.7547
	2	58.56	2.2029	23.4783
	3	55.52	2.80292	21.2555
	4	57.5	0.901408	24.6761
	5	56.5473	1.7561	21.2683
1/25Tam	1	20.89	8.86331	28.6619
	2	24.01	8.69799	32.5369
	3	27.0267	7.31429	27.6571
	4	30.1467	7.48936	25.7589
	5	34.405	5	31.5
1/125Tam	1	0.0378	16.025	79.6244
	2	0.374	9.97101	71.8841
	3	0.87	9.35849	60.2767
	4	2.26	15.0744	74.1488
	5	2.815	11.3302	66.6482
	R squared	0.9755	0.9231	0.9131
