# Supplementary material for: The robust, high-throughput, and temporally regulated roxCre and loxCre reporting systems for genetic modifications in vivo
Source: eLife. 2026 Apr 20;13:RP97717. doi: 10.7554/eLife.97717 (PMC13095210; doi:10.7554/eLife.97717)
Supplement: Figure 7—source data 1. [file elife-97717-fig7-data1.xlsx]

## Sheet: Figure 7E
Sample	Alb-CreER;Rosa26-tdT2;Ctnnb1flox/flox	Alb-CreER;Rosa26-loxCre-tdT;Ctnnb1flox/flox	Alb-CreER;Rosa26-loxCre-tdT;Ctnnb1flox/+
1	0.255389	0.0107797	1.06217
2	0.283537	0.182973	0.953345
3	0.307679	0.0145372	0.984487
4	0.18006	0.0275111	1.08917
5	0.267396	0.0308899	0.910835
			one-way ANOVA: p value
Alb-CreER;Rosa26-tdT2;Ctnnb1flox/flox vs Alb-CreER;Rosa26-loxCre-tdT;Ctnnb1flox/flox			0.001
Alb-CreER;Rosa26-tdT2;Ctnnb1flox/flox vs Alb-CreER;Rosa26-loxCre-tdT;Ctnnb1flox/+			<0.0001
Alb-CreER;Rosa26-loxCre-tdT;Ctnnb1flox/flox vs Alb-CreER;Rosa26-loxCre-tdT;Ctnnb1flox/+			<0.0001

## Sheet: Figure 7F
Sample	Alb-CreER;Rosa26-tdT2;Ctnnb1flox/flox	Alb-CreER;Rosa26-loxCre-tdT;Ctnnb1flox/flox	Alb-CreER;Rosa26-loxCre-tdT;Ctnnb1flox/+
1	0.558	0.00352954	0.814686
2	1.467	0.0100641	0.893202
3	0.525	0.00801544	0.893537
4	0.416	0.00564608	1.12496
5	0.659	0.0106608	1.22276
6	0.848	0.0103648	1.16502
7	0.923	0.00530083	0.885834
			one-way ANOVA: p value
Alb-CreER;Rosa26-tdT2;Ctnnb1flox/flox vs Alb-CreER;Rosa26-loxCre-tdT;Ctnnb1flox/flox			<0.0001
Alb-CreER;Rosa26-tdT2;Ctnnb1flox/flox vs Alb-CreER;Rosa26-loxCre-tdT;Ctnnb1flox/+			0.1687
Alb-CreER;Rosa26-loxCre-tdT;Ctnnb1flox/flox vs Alb-CreER;Rosa26-loxCre-tdT;Ctnnb1flox/+			<0.0001

## Sheet: Figure 7G
	Alb-CreER;Rosa26-tdT2;Ctnnb1flox/flox							Alb-CreER;Rosa26-loxCre-tdT;Ctnnb1flox/flox							Alb-CreER;Rosa26-loxCre-tdT;Ctnnb1flox/+
sample	1	2	3	4	5	6	7	1	2	3	4	5	6	7	1	2	3	4	5	6	7
Glul	0.20337	0.840969	0.064671	0.0765731	0.108259	0.0525347	0.097396	0.0216654	0.0451183	0.0324731	0.0479008	0.0314522	0.0772092	0.0398733	1.30407	0.552789	1.11476	1.42724	1.26036	0.671358	0.669429
Oat	0.80407	1.34995	0.72198	0.408465	0.364117	1.42299	0.569499	0.0165507	0.0230137	0.0161742	0.0321426	0.02017	0.0439062	0.0265313	0.996696	0.692395	1.13518	1.52643	1.21005	0.856518	0.582732
Axin2	0.336342	0.794332	0.295245	0.176465	0.219848	0.695248	0.141026	0.00473032	0.00555147	0.00489086	0.00853705	0.00837138	0.0182986	0.006667	1.12288	0.610268	1.24901	1.28177	1.38751	0.755157	0.593398
Tcf7	0.567248	1.71392	0.439776	0.374518	0.445913	1.10561	0.372744	0.0700807	0.237671	0.331652	0.393867	0.285915	0.112993	0.0704123	1.09354	0.616758	1.06799	1.36571	1.3124	0.792036	0.751574
Lect2	0.551064	1.53542	0.418567	0.283907	0.338059	1.2702	0.440557	0.012287	0.00556782	0.00442389	0.0116832	0.00652889	0.0230408	0.00871839	1.04834	0.638313	0.917245	1.21594	1.259	1.05433	0.866835
Tbx3	0.295332	1.26673	0.41637	0.23566	0.235787	0.69921	0.232399	0.028116	0.0252836	0.0242068	0.028744	0.026907	0.0715687	0.0319318	1.08645	0.510103	0.978781	1.38794	1.63232	0.682567	0.721839
Slc1a2	0.350799	1.05424	0.381205	0.205059	0.202515	0.821465	0.263093	3.16984e-05	0.000175267	0.000263747	7.75092e-05	3.25356e-05	0.00014363	7.02019e-05	0.825535	0.620549	1.11616	1.63874	1.53173	0.57962	0.687665
Cyp2e1	0.65988	1.38954	0.832404	0.484183	0.361937	1.37403	0.505312	0.0160645	0.0234883	0.0269018	0.0326067	0.015755	0.0333921	0.0179108	0.792516	0.655408	1.08912	1.92625	1.22019	0.661498	0.655022
							one-way ANOVA: p value									one-way ANOVA: p value
Glul	Alb-CreER;Rosa26-tdT2;Ctnnb1flox/flox vs Alb-CreER;Rosa26-loxCre-tdT;Ctnnb1flox/flox						0.4907		Lect2	Alb-CreER;Rosa26-tdT2;Ctnnb1flox/flox vs Alb-CreER;Rosa26-loxCre-tdT;Ctnnb1flox/flox						0.002
	Alb-CreER;Rosa26-tdT2;Ctnnb1flox/flox vs Alb-CreER;Rosa26-loxCre-tdT;Ctnnb1flox/+						<0.0001			Alb-CreER;Rosa26-tdT2;Ctnnb1flox/flox vs Alb-CreER;Rosa26-loxCre-tdT;Ctnnb1flox/+						0.1844
	Alb-CreER;Rosa26-loxCre-tdT;Ctnnb1flox/flox vs Alb-CreER;Rosa26-loxCre-tdT;Ctnnb1flox/+						<0.0001			Alb-CreER;Rosa26-loxCre-tdT;Ctnnb1flox/flox vs Alb-CreER;Rosa26-loxCre-tdT;Ctnnb1flox/+						<0.0001
Oat	Alb-CreER;Rosa26-tdT2;Ctnnb1flox/flox vs Alb-CreER;Rosa26-loxCre-tdT;Ctnnb1flox/flox						0.0005		Tbx3	Alb-CreER;Rosa26-tdT2;Ctnnb1flox/flox vs Alb-CreER;Rosa26-loxCre-tdT;Ctnnb1flox/flox						0.0444
	Alb-CreER;Rosa26-tdT2;Ctnnb1flox/flox vs Alb-CreER;Rosa26-loxCre-tdT;Ctnnb1flox/+						0.4826			Alb-CreER;Rosa26-tdT2;Ctnnb1flox/flox vs Alb-CreER;Rosa26-loxCre-tdT;Ctnnb1flox/+						0.0197
	Alb-CreER;Rosa26-loxCre-tdT;Ctnnb1flox/flox vs Alb-CreER;Rosa26-loxCre-tdT;Ctnnb1flox/+						<0.0001			Alb-CreER;Rosa26-loxCre-tdT;Ctnnb1flox/flox vs Alb-CreER;Rosa26-loxCre-tdT;Ctnnb1flox/+						<0.0001
Axin2	Alb-CreER;Rosa26-tdT2;Ctnnb1flox/flox vs Alb-CreER;Rosa26-loxCre-tdT;Ctnnb1flox/flox						0.0289		Slc1a2	Alb-CreER;Rosa26-tdT2;Ctnnb1flox/flox vs Alb-CreER;Rosa26-loxCre-tdT;Ctnnb1flox/flox						0.0334
	Alb-CreER;Rosa26-tdT2;Ctnnb1flox/flox vs Alb-CreER;Rosa26-loxCre-tdT;Ctnnb1flox/+						0.0005			Alb-CreER;Rosa26-tdT2;Ctnnb1flox/flox vs Alb-CreER;Rosa26-loxCre-tdT;Ctnnb1flox/+						0.0153
	Alb-CreER;Rosa26-loxCre-tdT;Ctnnb1flox/flox vs Alb-CreER;Rosa26-loxCre-tdT;Ctnnb1flox/+						<0.0001			Alb-CreER;Rosa26-loxCre-tdT;Ctnnb1flox/flox vs Alb-CreER;Rosa26-loxCre-tdT;Ctnnb1flox/+						<0.0001
Tcf7	Alb-CreER;Rosa26-tdT2;Ctnnb1flox/flox vs Alb-CreER;Rosa26-loxCre-tdT;Ctnnb1flox/flox						0.0358		Cyp2e1	Alb-CreER;Rosa26-tdT2;Ctnnb1flox/flox vs Alb-CreER;Rosa26-loxCre-tdT;Ctnnb1flox/flox						0.0023
	Alb-CreER;Rosa26-tdT2;Ctnnb1flox/flox vs Alb-CreER;Rosa26-loxCre-tdT;Ctnnb1flox/+						0.301			Alb-CreER;Rosa26-tdT2;Ctnnb1flox/flox vs Alb-CreER;Rosa26-loxCre-tdT;Ctnnb1flox/+						0.5732
	Alb-CreER;Rosa26-loxCre-tdT;Ctnnb1flox/flox vs Alb-CreER;Rosa26-loxCre-tdT;Ctnnb1flox/+						0.0013			Alb-CreER;Rosa26-loxCre-tdT;Ctnnb1flox/flox vs Alb-CreER;Rosa26-loxCre-tdT;Ctnnb1flox/+						0.0003
